# Supplementary material for: Synthesis, spectral and electrochemical investigations of bichromophoric pentads possessing tetraazaporphyrin and (bipy)2RuII/(phen)2RuII moieties
Source: Royal Society of Chemistry journal article supplement (doi:10.1039/b209812a), 2003-01-27

# Supplementary information

Electronic spectra of **1**, **2**, **4**  and the composite of **1+4** showing shift in position and intensity of the d(Ru) *(bpy) MLCT absorption.


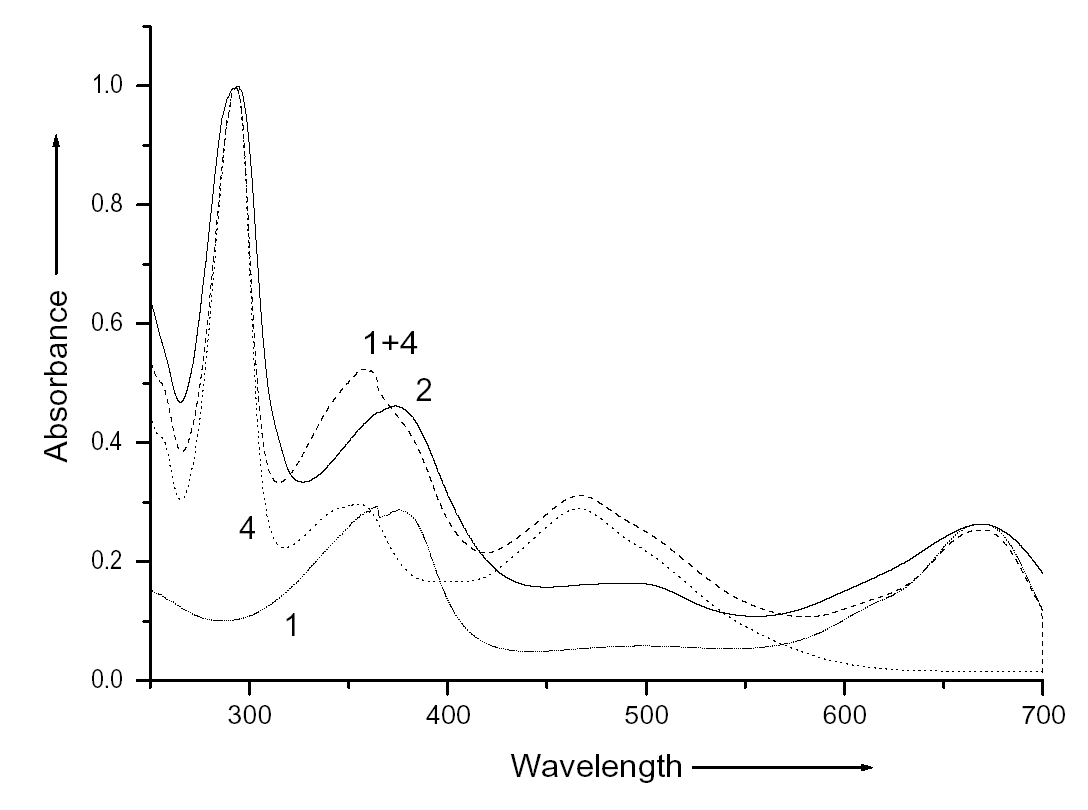

Supplement: esi.doc [file esi.doc]
